# Supplementary material for: Size and property bimodality in magnetic nanoparticle dispersions: single domain particles vs. strongly coupled nanoclusters
Source: Royal Society of Chemistry journal article supplement (doi:10.1039/c7nr00023e), 2017-01-01
Supplement: c7nr00023e1.pdf [file c7nr00023e1.pdf]

# Supplementary information to: **Size and property bimodality in magnetic nanoparticle dispersions: Single domain particles vs strongly coupled nanoclusters**

*E. Wetterskog<sup>a,\*</sup>, A. Castro<sup>b</sup>, L. Zeng<sup>c</sup>, S. Petronis<sup>d</sup>, D. Heinke<sup>e</sup>, E. Olsson<sup>c</sup>, L. Nilsson<sup>b,f</sup>, N. Gehrke,<sup>e</sup> and P. Svedlindh<sup>a</sup>*

---

<sup>a</sup>*Solid state physics, Department of Engineering Sciences, Ångström Laboratory, Uppsala University, Sweden, email:  
erik.wetterskog@angstrom.uu.se*

<sup>b</sup>*SOLVE Research and Consultancy AB, Lund, Sweden*

<sup>c</sup>*Department of Applied Physics, Chalmers University of Technology, Göteborg, Sweden*

<sup>d</sup>*SP Chemistry, Materials and Surfaces, SP Technical Research Institute of Sweden, Borås, Sweden*

<sup>e</sup>*nanoPET Pharma GmbH, Berlin, Germany*

<sup>f</sup>*Lund Centre for Field-Flow Fractionation, Department of Food Technology, Engineering and Nutrition, Lund University, Sweden*

## ADDITIONAL STRUCTURAL CHARACTERIZATION OF NANOCLOUDS

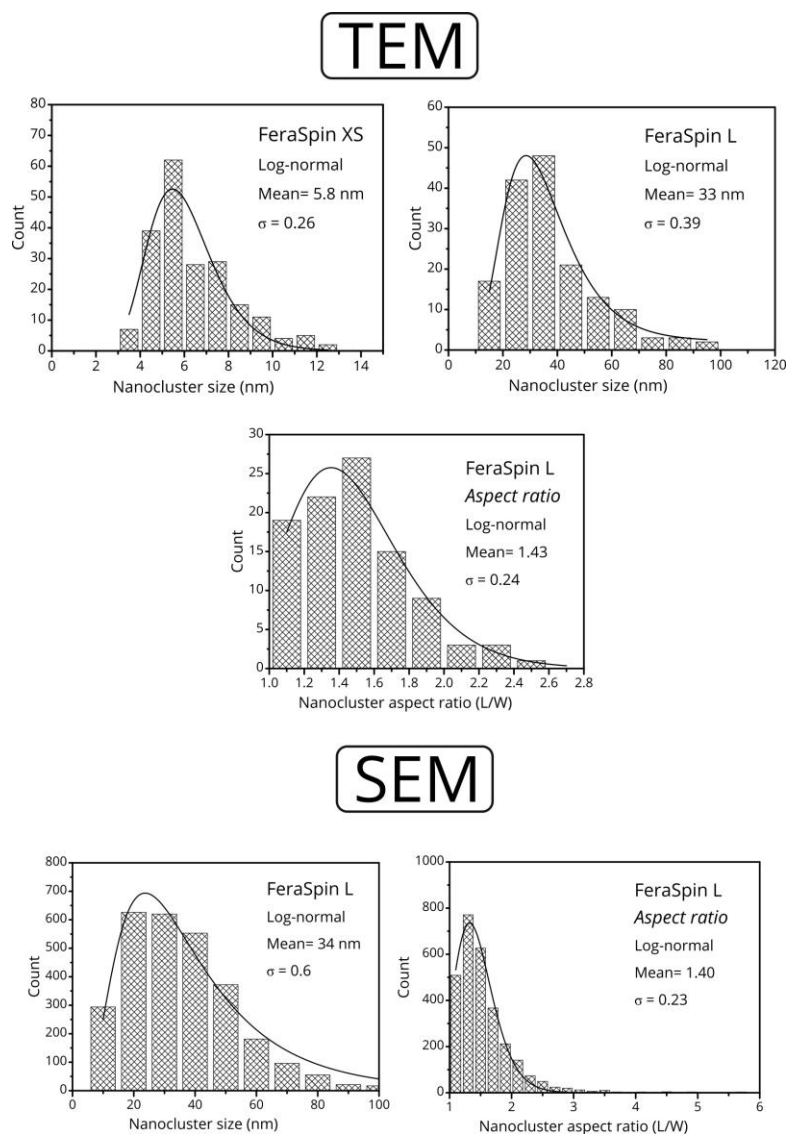

Figure S 1: Histogram of the nanocrystals (FeraSpin XS) and nanocluster (FeraSpin L) sizes, and the aspect ratio (L/W) for FeraSpin L as determined by SEM and TEM.

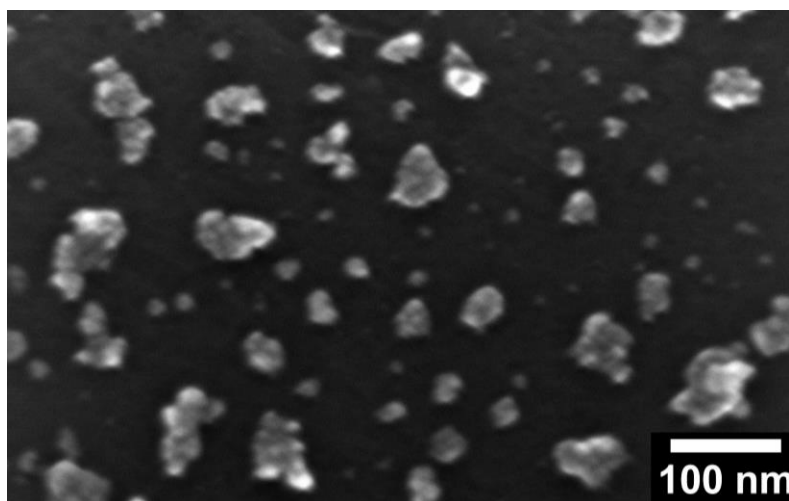

Figure S 2: SEM image of FeraSpin L nanoclusters immobilized on a Si substrate. Please refer to the experimental section for more details on the sample preparation.

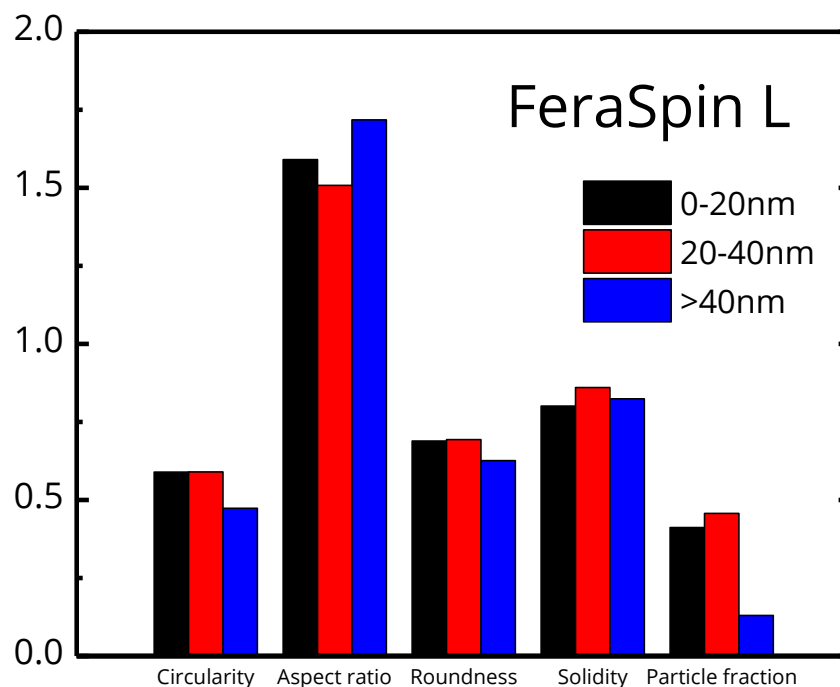

Figure S 3: Particle characteristics for Feraspin L derived from the SEM analysis using ImageJ, sorted in three different size regimes. Definitions are here as in the documentation of ImageJ. *Aspect ratio*: the aspect ratio of the fitted ellipse to the particle projection, i.e., [Major Axis] / [Minor Axis]. *Roundness*:  $(4 \times [\text{Area}]) / (\pi \times [\text{Major axis}]^2)$  or the inverse of [Aspect ratio]. *Solidity*:  $[\text{Area}] / [\text{Convex hull area}]$ , where convex hull can be thought of as a rubber band wrapped tightly around the projection of the particle. For example, a circle, ellipse, triangle or rectangle would have Solidity = 1, while star- or flower-like shape would have Solidity <1. *Circularity*:  $(4\pi \times [\text{Area}]) / ([\text{Perimeter}]^2)$  with a value of 1.0 indicating a perfect circle. As the value approaches 0.0, it indicates an increasingly elongated shape.

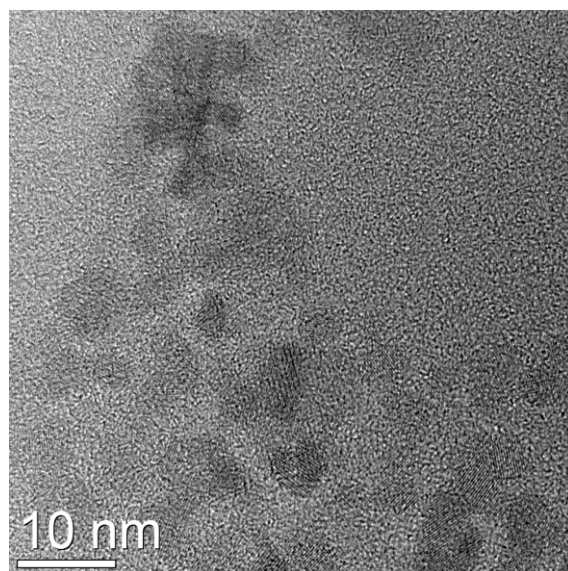

Figure S 4: Soft aggregate in FeraSpin XS, a possible drying artefact during TEM sample preparation. The absence of nanoclusters of larger sizes in the AF4 fractograms, FMR spectra and temperature dependent AC-magnetometry suggest that these agglomerates are either statistically insignificant or formed during de-wetting of the water film evaporation of the dispersion.

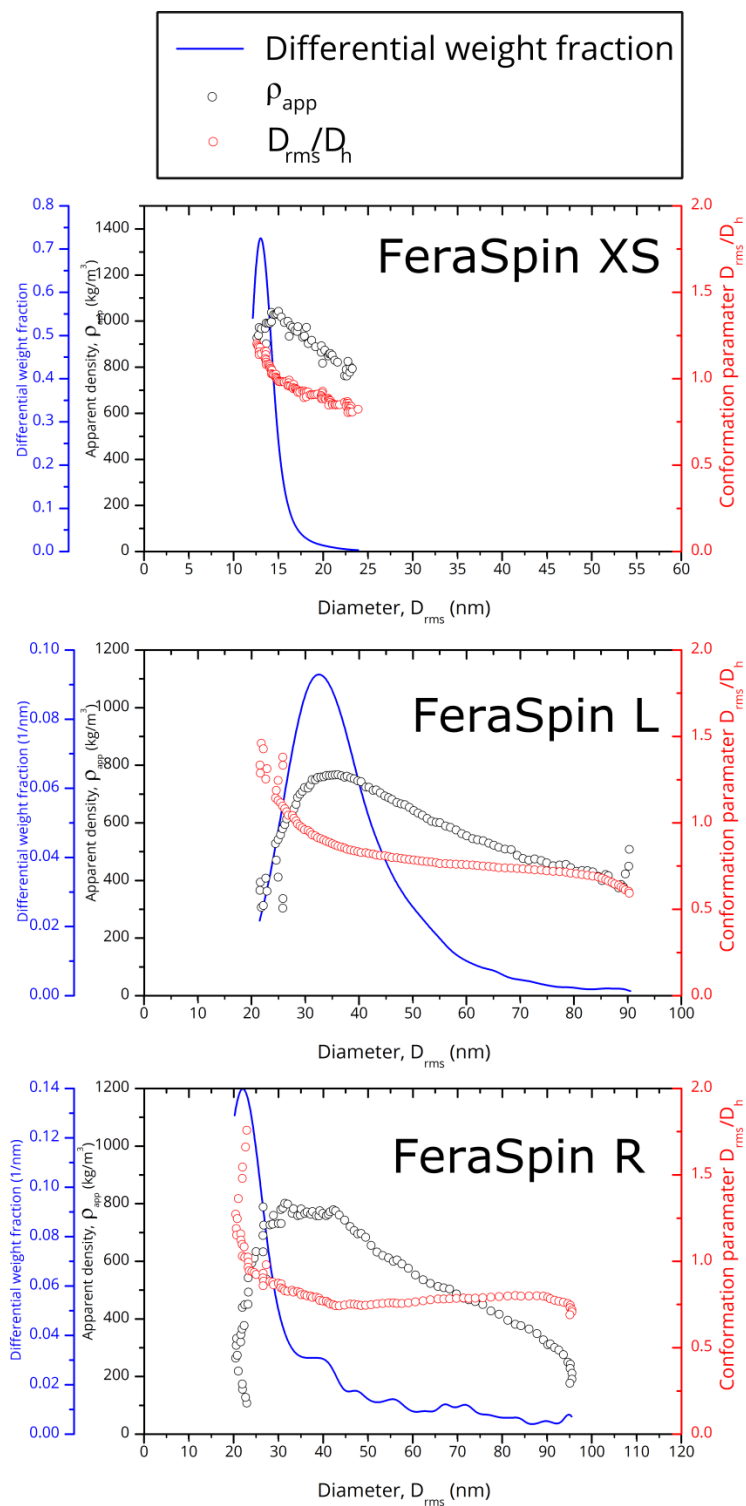

Figure S 5: Differential weight fractions, apparent density ( $\rho_{app}$ ), and conformational parameter ( $D_{rms}/D_h$ ) as a function of  $D_{rms}$  for dispersions of FeraSpin XS, L, and R.

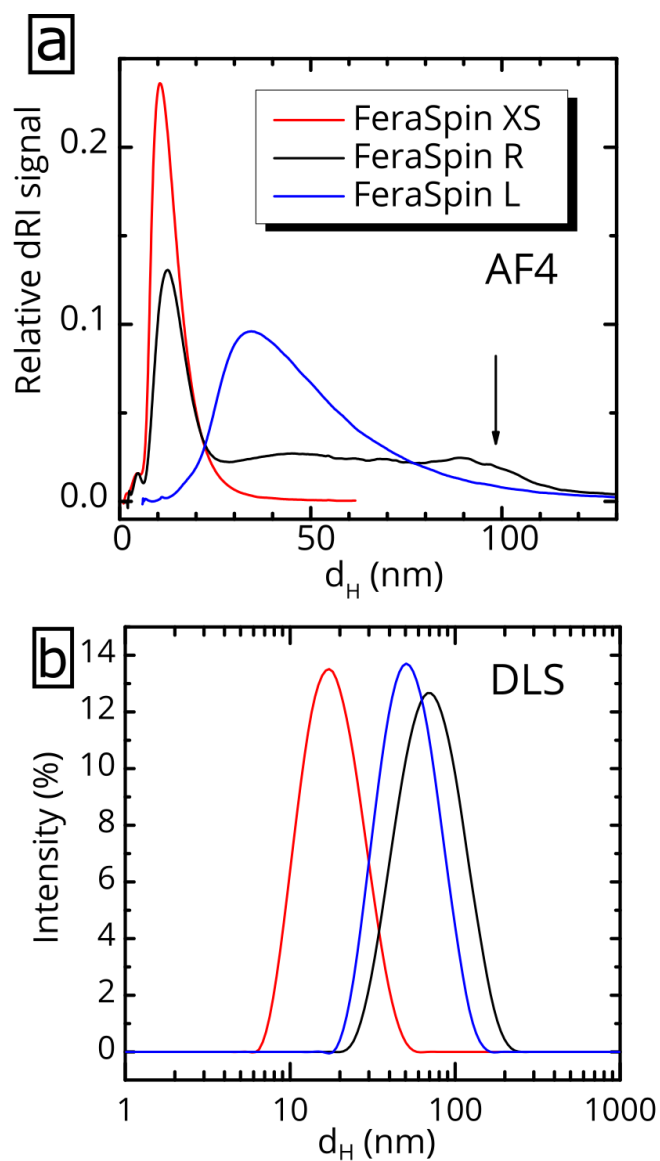

Figure S 6: Comparison of the relative signals of the (a) AF4 refractive index fractograms for the three samples FeraSpin XS, L and R with (b) DLS data. As seen in the figure, FeraSpin R has a longer tail (see arrow) than FeraSpin L, and subsequently has a slightly wider size distribution of colloidal nanoclusters than FeraSpin L.

## CALCULATION OF THE DEMAGNETIZATION FACTORS FOR ELLIPSOIDAL PARTICLES

For a general (prolate) ellipsoid with semi-axes  $a > b = c$  we have that the components of the demagnetization tensor  $N$  are  $N_{zz}$ ,  $N_{yy}$ ,  $N_{xx}$  (for the semi-axes  $a$ ,  $b$ ,  $c$  respectively). In general, we have that,  $N_{zz} + N_{yy} + N_{xx} = 4\pi$ , and when  $m = a/c$ :

$$\frac{N_{zz}}{4\pi} = \frac{1}{m^2-1} \left( \frac{m}{2\sqrt{(m^2-1)}} \times \ln \left( \frac{m+\sqrt{(m^2-1)}}{m-\sqrt{(m^2-1)}} \right) - 1 \right),$$

$$\frac{N_{xx}}{4\pi} = \frac{N_{yy}}{4\pi} = \frac{m}{2(m^2-1)} \left( m - \frac{1}{2\sqrt{(m^2-1)}} \times \ln \left( \frac{m+\sqrt{(m^2-1)}}{m-\sqrt{(m^2-1)}} \right) \right),$$

The effective demagnetization factor can then be found through  $N_{eff} = N_{\perp} - N_{//}$ , where  $N_{xx} = N_{yy} = N_{\perp} > N_{//} = N_{zz}$ . Using a value of  $m = \frac{a}{c} = L/W$  (as shown in fig. S1) gives  $N_{eff} = 0.13$ .

## ADDITIONAL FMR DATA

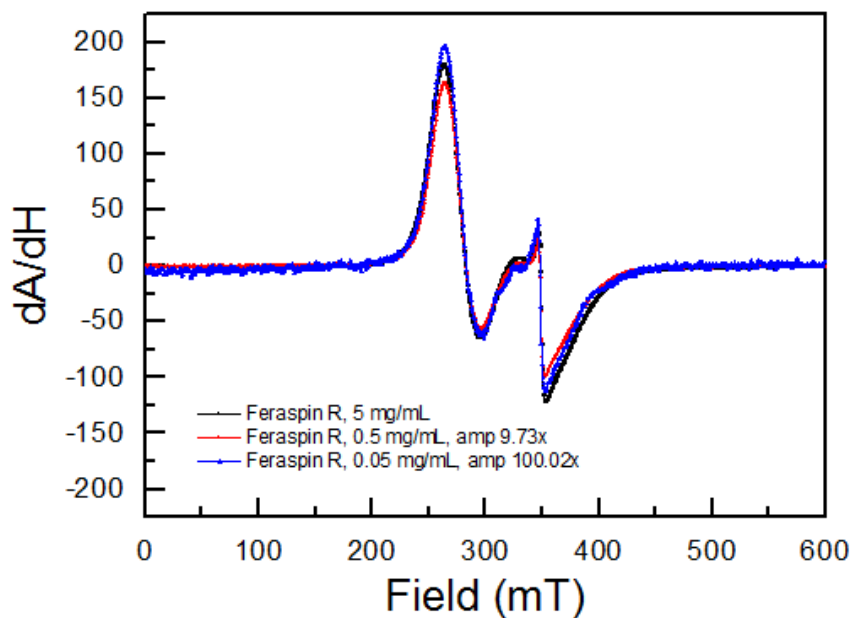

Figure S 7: A concentration series of FeraSpin R diluted  $\approx 10x$  and  $100x$ . The spectra have been renormalized according to the actual dilution factor, determined by weight. Although the data is rather noisy, there are no obvious concentration effects seen after renormalization.

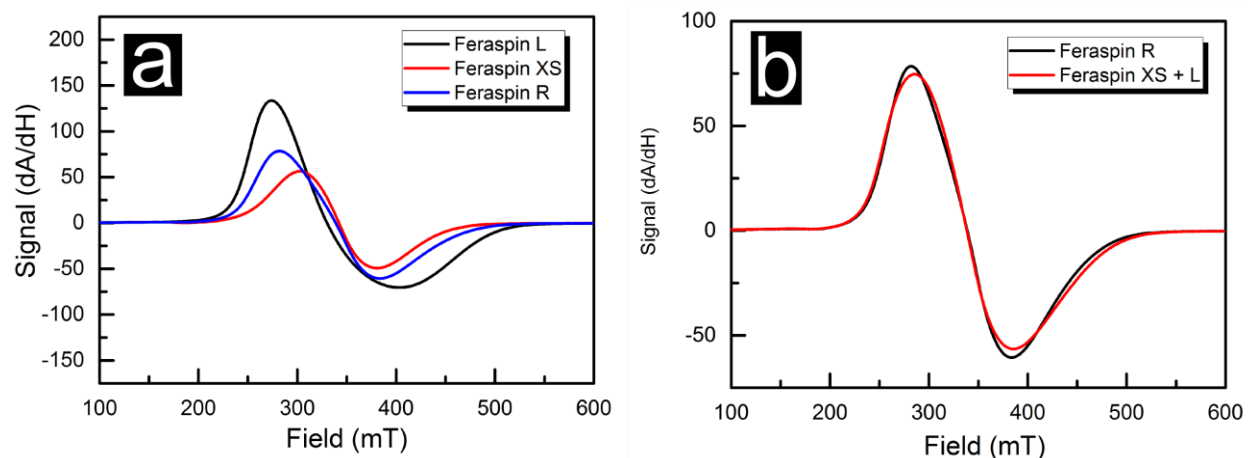

Figure S 8: Additional FMR spectra of immobilized particles. (a) FeraSpin XS, R and L adsorbed in cotton wool. (b) Linear combination fit of the FeraSpin XS + L spectra to the FeraSpin R spectrum.

#### ADDITIONAL MAGNETIZATION DATA

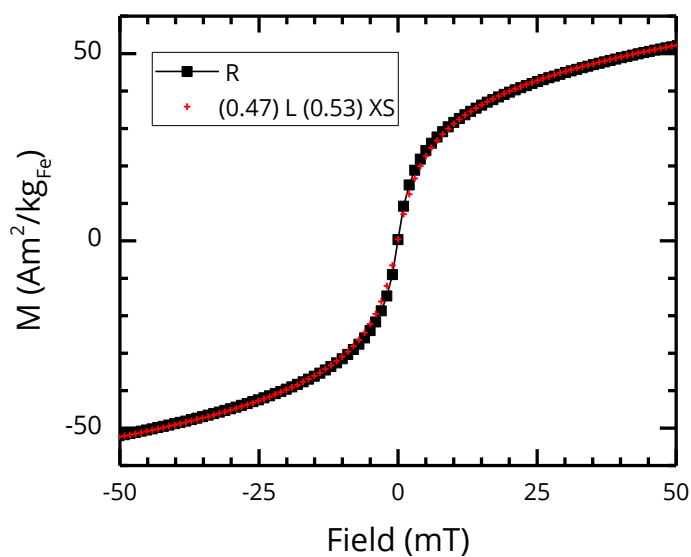

Figure S 9: Fit of the FeraSpin R magnetization ( $M$  vs.  $H$ ) curve using a linear combination of the magnetization curves of FeraSpin XS and FeraSpin L. As seen in the graph, there is a slight mismatch between the original and composite curves in the low-field ( $< 10$  mT) region.

Table S 1: Calculation of  $K_{\text{eff}}$  using the intra-well potential approximation given in the main paper (eq. 1). Other approximations used are  $\rho = 5 \text{ g/cm}^3$  and  $m(\text{Fe})/m(\text{Fe}_x\text{O}_y) = 0.7$  (valid for  $\gamma\text{-Fe}_2\text{O}_3$ ). We estimated errors assuming an error in the magnetic moment of 3%.

| Sample      | $M_s(0)$                                          | Fitted<br>$\chi^{\perp T \rightarrow 0}$<br><i>dimensionless</i><br><i>SI units</i> | Effective<br>anisotropy<br>$AC (\chi^{\perp T \rightarrow 0})$<br>$10^4 \text{ J/m}^3$ |
|-------------|---------------------------------------------------|-------------------------------------------------------------------------------------|----------------------------------------------------------------------------------------|
| FeraSpin XS | 110 Am <sup>2</sup> /kg <sub>Fe</sub><br>385 kA/m | 2.25                                                                                | 2.8(2)                                                                                 |
| FeraSpin L  | 120 Am <sup>2</sup> /kg <sub>Fe</sub><br>420 kA/m | 3.50                                                                                | 2.1(2)                                                                                 |
